# Supplementary material for: Protein Complexes are Central in the Yeast Genetic Landscape
Source: PLoS Comput Biol. 2011 Feb 24;7(2):e1001092. doi: 10.1371/journal.pcbi.1001092 (PMC3044758; doi:10.1371/journal.pcbi.1001092)
Supplement: Dataset S1 — The file contains the list of the monochromatic processes (described by GO identifier and name), number of genes associated with each process, number of genes in the SGA data, number of genes connected by SGA interactions, number of observed/positive/negative interactions, monochromatic score/Z-score and coverage ratios. (0.03 MB XLS) [file pcbi.1001092.s001.xls]

## Sheet: monochromatic processes
GO.ID	GO.Name	GeneYeast	GeneSGA	GeneSGAconnected	ObserGI	posGI	negGI	Monochromatic Score	Monochromatic Zscore	ratioGeneSGAYeast	ratioGeneSGAConSGA
GO:0016237	microautophagy	43	40	26	36	29	7	0.554995	2.0833	0.930233	0.65
GO:0031297	replication fork processing	3	3	3	3	3	0	1	1.90235	1	1
GO:0016574	histone ubiquitination	4	4	4	5	5	0	1	1.87983	1	1
GO:0043486	histone exchange	10	9	6	13	13	0	1	1.78285	0.9	0.666667
GO:0034227	tRNA thio-modification	5	4	4	5	5	0	1	1.60115	0.8	1
GO:0043632	modification-dependent macromolecule catabolic process	174	113	102	280	91	189	-0.579714	-1.60541	0.649425	0.902655
GO:0051246	regulation of protein metabolic process	228	148	132	538	177	361	-0.570665	-1.63988	0.649123	0.891892
GO:0007264	small GTPase mediated signal transduction	60	49	41	103	13	90	-0.863969	-1.6493	0.816667	0.836735
GO:0046394	carboxylic acid biosynthetic process	137	88	65	160	33	127	-0.705792	-1.67268	0.642336	0.738636
GO:0016053	organic acid biosynthetic process	137	88	65	160	33	127	-0.705792	-1.67268	0.642336	0.738636
GO:0006066	alcohol metabolic process	198	154	126	262	89	173	-0.566164	-1.71173	0.777778	0.818182
GO:0010564	regulation of cell cycle process	94	75	62	121	29	92	-0.722339	-1.72721	0.797872	0.826667
GO:0051129	negative regulation of cellular component organization	71	53	45	198	27	171	-0.85424	-1.77927	0.746479	0.849057
GO:0007346	regulation of mitotic cell cycle	78	57	44	96	16	80	-0.848644	-1.80312	0.730769	0.77193
GO:0006984	ER-nuclear signaling pathway	84	66	60	238	55	183	-0.749163	-1.88124	0.785714	0.909091
GO:0040007	growth	131	106	98	323	83	240	-0.627486	-1.90107	0.80916	0.924528
GO:0015031	protein transport	266	190	182	959	315	644	-0.539502	-1.9018	0.714286	0.957895
GO:0019941	modification-dependent protein catabolic process	156	104	89	234	63	171	-0.660586	-1.96345	0.666667	0.855769
GO:0006511	ubiquitin-dependent protein catabolic process	156	104	89	234	63	171	-0.660586	-1.96345	0.666667	0.855769
GO:0017038	protein import	111	69	61	173	33	140	-0.809004	-2.01031	0.621622	0.884058
GO:0006519	cellular amino acid and derivative metabolic process	271	180	142	359	106	253	-0.573218	-2.01408	0.664207	0.788889
GO:0007017	microtubule-based process	107	68	61	413	100	313	-0.780601	-2.04651	0.635514	0.897059
GO:0044106	cellular amine metabolic process	207	128	94	189	43	146	-0.696263	-2.20101	0.618357	0.734375
GO:0006520	cellular amino acid metabolic process	207	128	94	189	43	146	-0.696263	-2.20101	0.618357	0.734375
GO:0034641	cellular nitrogen compound metabolic process	244	166	120	212	52	160	-0.642646	-2.22801	0.680328	0.722892
GO:0006260	DNA replication	81	55	52	226	21	205	-0.903207	-2.24611	0.679012	0.945455
GO:0007049	cell cycle	113	68	61	278	44	234	-0.861077	-2.31754	0.60177	0.897059
GO:0030010	establishment of cell polarity	102	78	73	319	65	254	-0.748182	-2.33262	0.764706	0.935897
GO:0019953	sexual reproduction	170	133	119	531	132	399	-0.648472	-2.34908	0.782353	0.894737
GO:0033043	regulation of organelle organization	119	74	64	147	27	120	-0.837123	-2.35759	0.621849	0.864865
GO:0022403	cell cycle phase	148	91	78	294	61	233	-0.783388	-2.42838	0.614865	0.857143
GO:0009308	amine metabolic process	257	171	139	330	92	238	-0.633109	-2.46526	0.66537	0.812865
GO:0006605	protein targeting	209	144	136	510	143	367	-0.62715	-2.48949	0.688995	0.944444
GO:0007163	establishment or maintenance of cell polarity	114	88	82	336	70	266	-0.742562	-2.55499	0.77193	0.931818
GO:0006886	intracellular protein transport	249	175	166	772	224	548	-0.602723	-2.55912	0.702811	0.948571
GO:0051301	cell division	109	81	71	265	48	217	-0.801923	-2.59818	0.743119	0.876543
GO:0007010	cytoskeleton organization	186	126	114	602	156	446	-0.686039	-2.62323	0.677419	0.904762
GO:0000003	reproduction	240	184	170	870	232	638	-0.628891	-2.98349	0.766667	0.923913
GO:0044262	cellular carbohydrate metabolic process	186	146	127	476	116	360	-0.720518	-3.10252	0.784946	0.869863
GO:0006281	DNA repair	194	134	121	691	153	538	-0.713378	-3.21614	0.690722	0.902985
GO:0048193	Golgi vesicle transport	182	129	120	847	201	646	-0.724217	-3.22246	0.708791	0.930233
GO:0034984	cellular response to DNA damage stimulus	207	146	132	775	178	597	-0.701402	-3.28661	0.705314	0.90411
GO:0051128	regulation of cellular component organization	173	120	107	461	84	377	-0.807515	-3.39323	0.693642	0.891667
GO:0051726	regulation of cell cycle	172	132	117	475	105	370	-0.75895	-3.41126	0.767442	0.886364
GO:0006974	response to DNA damage stimulus	242	167	153	977	232	745	-0.684744	-3.46904	0.690083	0.916168
GO:0005975	carbohydrate metabolic process	254	199	178	643	179	464	-0.666922	-3.50774	0.783465	0.894472
GO:0007242	intracellular signaling cascade	212	171	163	971	247	724	-0.683702	-3.78603	0.806604	0.953216
GO:0007047	cell wall organization	220	191	169	1090	224	866	-0.736018	-4.2669	0.868182	0.884817
GO:0045229	external encapsulating structure organization	220	191	169	1090	224	866	-0.736018	-4.2669	0.868182	0.884817
GO:0070882	cell wall organization or biogenesis	227	195	173	1135	240	895	-0.728242	-4.3106	0.859031	0.887179
